# The Prevalence and Molecular Spectrum of $\alpha$ - and $\beta$ -Globin Gene Mutations in 14,332 Families of Guangdong Province, China

Aihua Yin<sup>1,2,3,9</sup>, Bing Li<sup>3,4,9</sup>, Mingyong Luo<sup>1,2,3,9</sup>, Longchang Xu<sup>3,4</sup>, Li Wu<sup>3,4</sup>, Liang Zhang<sup>5</sup>, Yuanzhu Ma<sup>3,4</sup>, Tingting Chen<sup>3,4</sup>, Shuang Gao<sup>3,4</sup>, Juqing Liang<sup>1,2,3</sup>, Hao Guo<sup>1,2,3</sup>, Danqing Qin<sup>1,2,3</sup>, Jicheng Wang<sup>1,2,3</sup>, Tenglong Yuan<sup>1,2,3</sup>, Yixia Wang<sup>1,2,3</sup>, Wei-wei Huang<sup>5</sup>, Wen-Fei He<sup>5</sup>, Yanxia Zhang<sup>1,2,3</sup>, Chang Liu<sup>1,2,3</sup>, Sujian Xia<sup>6</sup>, Qingshan Chen<sup>7</sup>, Qingguo Zhao<sup>3,4</sup>, Xiaozhuang Zhang<sup>3\*</sup>

**1** Prenatal Diagnosis Centre, Guangdong Women and Children Hospital, Guangzhou, Guangdong, China, **2** Maternal and Children Metabolic-Genetic Key Laboratory, Guangdong Women and Children Hospital, Guangzhou, Guangdong, China, **3** Thalassemia Diagnosis Centre, Guangdong Women and Children Hospital, Guangzhou, Guangdong, China, **4** Department of Healthcare, Guangdong Women And Children Hospital, Guangzhou, Guangdong, China, **5** BioChain (Beijing) Science and Technology Inc., Beijing, China, **6** Department of Epidemiology, Medical College, Jinan University, Guangzhou, Guangdong, China, **7** Department of Health Statistics, Medical College, Jinan University, Guangzhou, Guangdong, China

## Abstract

**Objective:** To reveal the familial prevalence and molecular variation of  $\alpha$ - and  $\beta$ -globin gene mutations in Guangdong Province.

**Methods:** A total of 40,808 blood samples from 14,332 families were obtained and analyzed for both hematological and molecular parameters.

**Results:** A high prevalence of  $\alpha$ - and  $\beta$ -globin gene mutations was found. Overall, 17.70% of pregnant women, 15.94% of their husbands, 16.03% of neonates, and 16.83% of couples (pregnant women and their husbands) were heterozygous carriers of  $\alpha$ - or  $\beta$ -thalassemia. The regions with the highest prevalence were the mountainous and western regions, followed by the Pearl River Delta; the region with the lowest prevalence was Chaoshan. The total familial carrier rate (both spouses were  $\alpha$ - or  $\beta$ -thalassemia carriers) was 1.87%, and the individual carrier rates of  $\alpha$ - and  $\beta$ -thalassemia were 1.68% and 0.20%, respectively. The total rate of moderate-to-severe fetal thalassemia was 12.78% among couples in which both parents were carriers.

**Conclusions:** There was a high prevalence of  $\alpha$ - and  $\beta$ -thalassemia in Guangdong Province. This study will contribute to the development of thalassemia prevention and control strategies in Guangdong Province.

**Citation:** Yin A, Li B, Luo M, Xu L, Wu L, et al. (2014) The Prevalence and Molecular Spectrum of  $\alpha$ - and  $\beta$ -Globin Gene Mutations in 14,332 Families of Guangdong Province, China. PLoS ONE 9(2): e89855. doi:10.1371/journal.pone.0089855

**Editor:** Klaus Brusgaard, Odense University hospital, Denmark

**Received:** September 14, 2013; **Accepted:** January 27, 2014; **Published:** February 27, 2014

**Copyright:** © 2014 Yin et al. This is an open-access article distributed under the terms of the Creative Commons Attribution License, which permits unrestricted use, distribution, and reproduction in any medium, provided the original author and source are credited.

**Funding:** The study was the program of the medical scientific research fund of Guangdong; the numbers were C2012009 and C2012010. This work was supported by the fund from the program of thalassemia prevention and control of Guangdong Province (the number of government document was Guangdong Finance [2011] 531). The funders had no role in study design, data collection and analysis, decision to publish, or preparation of the manuscript.

**Competing Interests:** The authors have declared that no competing interests exist.

\* E-mail: zhangxiaozhuang55@126.com

<sup>9</sup> These authors contributed equally to this work.

## Introduction

Thalassemia is an autosomal recessive heritable blood disorder resulting from hemoglobin-production deficiency [1,2]. It is one of the most common monogenic disorders in the world and is mainly endemic in some areas of the tropics and subtropics, including southern China [3]. There are two types of thalassemia,  $\alpha$ - and  $\beta$ -thalassemia. Most patients with severe  $\alpha$ -thalassemia may die *in utero* or shortly after birth as a result of serious intrauterine anemia, and most patients with severe  $\beta$ -thalassemia may develop serious anemia in early childhood if untreated. Thalassemia is an important public health problem in many countries, and its

prevention is mainly dependent on prenatal diagnosis and genetic counseling.

In China, thalassemia is widely distributed on the southern bank of the Yangtze River [4], particularly in southern China, in the Guangdong, Guangxi and Hainan Provinces [5,6,7,8,9]. Previous studies have reported an estimated carrier rate of 3.16–11.72% for  $\alpha$ -thalassemia and 1.96–3.87% for  $\beta$ -thalassemia in some regions of Guangdong Province [9,10]; however, these studies may not reveal the true prevalence of thalassemia in Guangdong province because of a limited sampling area and sample size. Furthermore, the main aim of a thalassemia prevention and control program is to prevent the birth of infants with moderate-to-severe thalassemia, so pregnant women and their husbands are critical targets of

such programs. Pregnant women, their fetuses and their husbands were enrolled in the study, and a large-scale familial investigation was conducted in 21 regions of Guangdong Province to reveal the familial prevalence of thalassemia and provide scientific basis for thalassemia prevention and control in the province.

## Materials and Methods

### Study design and subjects

A two-stage cluster-sampling method was employed in the study, and the sampling area covered all 21 regions of Guangdong Province. In the first stage, we randomly sampled one county in each of the twenty-one regions of Guangdong Province. In the second stage, we sampled one or several hospitals with qualified midwives on staff in each county; in all, 91 hospitals were included in our study. Among 91 sampling hospitals with qualified midwives, 58.2% (53/91) of them are located in urban areas and 41.8% (38/91) are located in rural areas; and for grade of sampling hospitals, 2.2% (2/91), 13.2% (12/91), 42.9% (39/91) and 41.8% (38/91) of them are respectively provincial, municipal, county, town and community level (Table 1, Table S1). From each hospital, we selected pregnant women who were going to deliver between May and August 2012 and their husbands. The inclusion criteria were that one or both of the spouses were of Guangdong ancestry. After obtaining written informed consent from all subjects, we collected peripheral venous blood from the pregnant women and their husbands as well as umbilical blood samples. In total, 14,332 families were initially contacted to participate in this study. Among all the couples, the people who were not Guangdong ancestry and the unqualified samples were excluded for this study. After selected, 40,808 blood samples (13,386 pregnant women, 13,148 husbands and 14,274 umbilical blood samples) were included in the final statistical analysis.

### Ethical declaration

The authors declare that the experiments comply with the current laws of China and gain informed consent of all the subjects before joining the study which had the approval by Medical Ethics Committee of Guangdong Women and Children Hospital.

### Hematological analysis

The blood samples were collected consecutively from 14,332 families between May and August 2012 in the sampled hospitals in twenty-one regions of Guangdong Province. The blood samples (3 ml) from all subjects were collected in EDTA tubes; routine blood tests were performed, and the samples were transported on ice to Guangdong Women and Children's Hospital for further

analysis. Automatic capillary electrophoresis (Sebia, France) was used to assess the concentration of the hemoglobins A, A2 and F as well as any abnormal hemoglobin variants, including Hb Bart's, Hb Constant Spring and Hb J.

### Molecular analysis

Genomic DNA was extracted from all peripheral venous blood and umbilical blood samples using an automation system Lab-Aid 820 (Zee San Biotech Company, Fujian, China). Twenty-three mutations, including three deletions associated with  $\alpha$ -thalassemia, three non-deletional mutations associated with  $\alpha$ -thalassemia, and seventeen point mutations associated with  $\beta$ -thalassemia, were identified using a suspension-array system developed by our lab, the sensitivity and specificity of which has been verified for various types of gene mutation; this system has been patented in the People's Republic of China (Pub. No.: WO/2012/136070). The method is based on the Luminex xMAP system, which was successfully applied to the genotyping of human papillomavirus (HPV) [11]. The procedure involved probe design, multiplex PCR, the attachment of probes to microspheres, hybridization and analysis. A single operator can complete the entire procedure in five hours. This system can accurately diagnose the genotype associated with thalassemia with high throughput. The 23 mutations we tested were most common and high incidence in Southern China which has been validated by several researchers [9,11,12], including deletional  $\alpha$ -globin mutations (the Southeast-Asian deletion (-SEA), the rightward deletion (- $\alpha$ 3.7) and the leftward deletion (- $\alpha$ 4.2)), point mutations associated with  $\alpha$ -thalassemia (Hb Constant Spring, Hb Quong Sze and Hb Westmead) and the seventeen point mutations associated with  $\beta$ -thalassemia (codon 41/42 (-TCTT), 654, -29 (A>G), -28 (A>G), codon 71/72 (+A), codon 17 (A>T), codon 43 (G>T), Hb E [ $\beta$ 26(B8)Glu→Lys, GAG>AAG or codon 26 (G>A)], codon 27/28 (+C), codon 31 (-C), -32 (C>A), -30 (T>C), codon 14/15 (+G), IVS-I-1 (G>T), IVS-I-5 (G>T), Int and Cap). The results of the molecular analysis with the suspension-array system were verified using a Gap-PCR kit (Shenzhen Yaneng Bio) for deletion mutations associated with  $\alpha$ -thalassemia and direct genomic sequencing for non-deletional mutations associated with  $\alpha$ -thalassemia and point mutations associated with  $\beta$ -thalassemia.

### Statistical analysis

Statistical analysis was conducted using the SPSS software (Ver. 13, SPSS Inc., Chicago, USA). The prevalence of familial thalassemia was evaluated by descriptive statistics. Bootstrap method was used to estimate the sampling error for the prevalences of thalassemia mutations.

**Table 1.** The situation of category of sampling hospitals with qualified midwives.

| Category                    | The number of sampling hospitals with qualified midwives | Percentage (%) |
|-----------------------------|----------------------------------------------------------|----------------|
| Urban or rural              |                                                          |                |
| urban                       | 53                                                       | 58.2           |
| Rural                       | 38                                                       | 41.8           |
| Grade of sampling hospitals |                                                          |                |
| Provincial level            | 2                                                        | 2.2            |
| Municipal level             | 12                                                       | 13.2           |
| County level                | 39                                                       | 42.9           |
| Town and community level    | 38                                                       | 41.8           |

doi:10.1371/journal.pone.0089855.t001

**Results**

**The prevalences of  $\alpha$ - and  $\beta$ -globin gene mutations among the pregnant women, their husbands and neonates**

Among 13,386 pregnant women and 13,148 of their husbands of Guangdong ancestry, the total number of  $\alpha$ - and  $\beta$ -globin gene mutations was 4,732 (17.83%); there were 3,531  $\alpha$ -globin gene mutations (13.31%), with mutation rates of 6.85% for the  $\text{---}^{\text{SEA}}$  deletion, 3.68% for the  $\text{---}\alpha^{3.7}$  deletion, and 1.27% for the  $\text{---}\alpha^{4.2}$  deletion; the remaining 1201 mutations were in the  $\beta$ -globin gene (4.53%), with mutation rates of 1.78% for the 41/42 (-CTTT) mutation and 1.18% for the IVS-II-654 (C $\rightarrow$ T) mutation. The prevalence of  $\alpha$ - and  $\beta$ -globin gene mutations among the pregnant women, their husbands and the 14,274 neonates of Guangdong ancestry was similar proportionately to that observed in the total population of pregnant women and husbands of Guangdong ancestry (Table 2).

In all, 4,725 deletion mutations associated with  $\alpha$ -thalassemia were verified using the Gap-PCR kit; 609 non-deletional mutations associated with  $\alpha$ -thalassemia and 1,820 point mutations associated with  $\beta$ -thalassemia were verified by direct genomic sequencing, and 341 samples randomly selected from 34,054

samples with negative results were also confirmed by corresponding above-mentioned methods.

**The rates of  $\alpha$ - and  $\beta$ -thalassemia carrier status among the pregnant women, their husbands and neonates**

Among the statistical samples, there were 4,465 thalassemia carriers (16.83%); of these, 3,268 (12.32%) were carriers of  $\alpha$ -thalassemia alone, 1,027(3.87%) were carriers of  $\beta$ -thalassemia alone and 170 (0.64%) were carriers of both  $\alpha$ - and  $\beta$ -thalassemia. The prevalence of the  $\alpha$ - and  $\beta$ -thalassemia carrier status among the pregnant women and their husbands of Guangdong ancestry and the 14,274 neonates with one or both parents of Guangdong ancestry were proportionally similar to that observed in the total population of pregnant women and husbands of Guangdong ancestry (Table 3).

**The rates of  $\alpha$ - and  $\beta$ -thalassemia carrier status among the pregnant women and their husbands in the 21 regions of Guangdong Province**

Among the 21 regions of Guangdong Province, the rate of  $\alpha$ -thalassemia carrier status in the 13386 pregnant women (ancestry data were missing for 799 subjects) and 13,148 husbands (ancestry data were missing for 1195 subjects) of Guangdong ancestry varied between 6.03 and 18.13. The rate is higher in mountainous

**Table 2.** The prevalences of  $\alpha$ - and  $\beta$ -globin gene mutations among the pregnant women, their husbands and neonates in Guangdong Province, China.

| Mutation                               | Pregnant women |                   | Husbands       |                   | Neonates       |                   | Pregnant women + Husbands |                   |
|----------------------------------------|----------------|-------------------|----------------|-------------------|----------------|-------------------|---------------------------|-------------------|
|                                        | n              | %                 | n              | %                 | n              | %                 | n                         | %                 |
| <b><math>\alpha</math>-Thalassemia</b> |                |                   |                |                   |                |                   |                           |                   |
| $\text{---}^{\text{SEA}}$              | 992±30         | 7.41±0.22         | 825±26         | 6.27±0.20         | 931±30         | 6.52±0.21         | 1817±40                   | 6.85±0.15         |
| $\text{---}\alpha^{3.7}$               | 501±21         | 3.74±0.16         | 475±22         | 3.61±0.17         | 487±22         | 3.41±0.15         | 976±31                    | 3.68±0.12         |
| $\text{---}\alpha^{4.2}$               | 192±14         | 1.43±0.10         | 145±12         | 1.1±0.09          | 177±13         | 1.24±0.09         | 337±18                    | 1.27±0.07         |
| $\text{---}\alpha^{\text{CS}}$         | 53±7           | 0.4±0.05          | 44±7           | 0.33±0.05         | 45±6           | 0.32±0.04         | 97±10                     | 0.37±0.04         |
| $\text{---}\alpha^{\text{QS}}$         | 30±5           | 0.22±0.04         | 22±5           | 0.17±0.04         | 25±5           | 0.18±0.04         | 52±7                      | 0.2±0.03          |
| $\text{---}\alpha^{\text{WS}}$         | 134±12         | 1±0.09            | 118±11         | 0.9±0.08          | 138±12         | 0.97±0.08         | 252±17                    | 0.95±0.06         |
| $\alpha$ -Thalassemia Total            | 1902±41        | 14.21±0.31        | 1629±37        | 12.39±0.28        | 1803±40        | 12.63±0.28        | 3531±56                   | 13.31±0.21        |
| <b><math>\beta</math>-Thalassemia</b>  |                |                   |                |                   |                |                   |                           |                   |
| Codons 41/42 (-CTTT)                   | 243±15         | 1.82±0.11         | 228±15         | 1.73±0.11         | 258±16         | 1.81±0.11         | 471±21                    | 1.78±0.08         |
| IVS-II-654 (C $\rightarrow$ T)         | 171±13         | 1.28±0.10         | 141±12         | 1.07±0.09         | 156±12         | 1.09±0.08         | 312±17                    | 1.18±0.06         |
| -29 (A $\rightarrow$ G)                | 10±3           | 0.07±0.02         | 9±3            | 0.07±0.02         | 9±3            | 0.06±0.02         | 19±5                      | 0.07±0.02         |
| -28 (A $\rightarrow$ G)                | 95±9           | 0.71±0.07         | 75±8           | 0.57±0.06         | 86±10          | 0.6±0.07          | 170±13                    | 0.64±0.05         |
| Codons 71/72 (+A)                      | 15±4           | 0.11±0.03         | 14±4           | 0.11±0.03         | 12±4           | 0.08±0.03         | 29±6                      | 0.11±0.02         |
| Condon 17, A $\rightarrow$ T           | 53±7           | 0.4±0.05          | 45±7           | 0.34±0.05         | 46±7           | 0.32±0.05         | 98±10                     | 0.37±0.04         |
| Condon 43 (G $\rightarrow$ T)          | 3±2            | 0.02±0.01         | 2±1            | 0.02±0.01         | 3±2            | 0.02±0.01         | 5±2                       | 0.02±0.01         |
| E                                      | 15±4           | 0.11±0.03         | 16±4           | 0.12±0.03         | 15±4           | 0.11±0.03         | 31±5                      | 0.12±0.02         |
| Codons 27/28 (+C)                      | 9±3            | 0.07±0.02         | 10±3           | 0.08±0.02         | 11±3           | 0.08±0.02         | 19±4                      | 0.07±0.02         |
| 14-15                                  | 6±2            | 0.04±0.01         | 4±2            | 0.03±0.02         | 2±1            | 0.01±0.01         | 10±3                      | 0.04±0.01         |
| IVS-I-1 (G $\rightarrow$ T)            | 4±2            | 0.03±0.01         | 4±2            | 0.03±0.02         | 7±3            | 0.05±0.02         | 8±3                       | 0.03±0.01         |
| IVS-II-5 (G $\rightarrow$ C)           | 2±1            | 0.01±0.01         | 1±1            | 0.01±0.01         | 1±1            | 0.01±0.01         | 3±2                       | 0.01±0.01         |
| Int                                    | 0±0            | 0±0.00            | 1±1            | 0.01±0.01         | 0              | 0±0.00            | 1±1                       | 0±0.00            |
| Cap                                    | 10±3           | 0.07±0.02         | 15±4           | 0.11±0.03         | 13±4           | 0.09±0.03         | 25±5                      | 0.09±0.02         |
| $\beta$ -Thalassemia Total             | 636±25         | 4.75±0.19         | 565±23         | 4.3±0.17          | 619±23         | 4.34±0.16         | 1201±34                   | 4.53±0.13         |
| <b>Total</b>                           | <b>2538±46</b> | <b>18.96±0.34</b> | <b>2194±42</b> | <b>16.69±0.32</b> | <b>2422±45</b> | <b>16.97±0.32</b> | <b>4732±63</b>            | <b>17.83±0.24</b> |

doi:10.1371/journal.pone.0089855.t002

**Table 3.** The rates of  $\alpha$ - and  $\beta$ -thalassemia carrier status among pregnant women, their husbands and neonates in Guangdong Province, China.

| Variable                                       | Pregnant women |                  | Husbands       |                  | Neonates       |                  | Pregnant women+ Husbands |                  |
|------------------------------------------------|----------------|------------------|----------------|------------------|----------------|------------------|--------------------------|------------------|
|                                                | N              | %                | N              | %                | N              | %                | N                        | %                |
| $\alpha$ -Thalassemia carrier only             | 1,735 $\pm$ 38 | 12.96 $\pm$ 0.28 | 1,533 $\pm$ 38 | 11.66 $\pm$ 0.29 | 1,675 $\pm$ 38 | 11.73 $\pm$ 0.27 | 3,268 $\pm$ 54           | 12.32 $\pm$ 0.20 |
| $\beta$ -Thalassemia carrier only              | 533 $\pm$ 23   | 3.98 $\pm$ 0.17  | 494 $\pm$ 22   | 3.76 $\pm$ 0.17  | 533 $\pm$ 22   | 3.73 $\pm$ 0.15  | 1,027 $\pm$ 33           | 3.87 $\pm$ 0.12  |
| Both $\alpha$ and $\beta$ -Thalassemia carrier | 102 $\pm$ 10   | 0.76 $\pm$ 0.07  | 68 $\pm$ 8     | 0.52 $\pm$ 0.06  | 81 $\pm$ 9     | 0.57 $\pm$ 0.06  | 170 $\pm$ 13             | 0.64 $\pm$ 0.05  |
| Total carrier                                  | 2,370 $\pm$ 44 | 17.70 $\pm$ 0.33 | 2,095 $\pm$ 41 | 15.93 $\pm$ 0.32 | 2,289 $\pm$ 44 | 16.04 $\pm$ 0.31 | 4,465 $\pm$ 61           | 16.83 $\pm$ 0.23 |

doi:10.1371/journal.pone.0089855.t003

regions (including Yunfu, Qingyuan, Meizhou, Heyuan and Shaoguan) and in western regions (including Yangjiang, Maoming and Zhanjiang) and is lowest in Chaoshan (including Jiayang, Chaozhou, Shanwei and Shantou; Fig. 1A).

For  $\beta$ -thalassemia carrier, the rate varied between 1.31 and 6.02, which is higher in the mountainous regions and western regions and is lowest in Chaoshan (Fig. 1B).

The rate of  $\alpha$ - and  $\beta$ -thalassemia carrier showed less variation, ranging from 0.15 to 1.89. The distributed status was similar to that of  $\beta$ -thalassemia carrier (Fig. 1C).

### Distributions of the $\alpha$ - and $\beta$ -globin genotypes and the frequencies of $\alpha$ - and $\beta$ -thalassemia

Among the 13,386 pregnant women of Guangdong ancestry, 1,837 were carriers of  $\alpha$ -thalassemia, and —SEA/ $\alpha\alpha$  was the most common mutation, accounting for more half of all  $\alpha$ -thalassemia genotypes (51.71%). Other high-prevalence genotypes were  $-\alpha 3.7/\alpha\alpha$ ,  $-\alpha 4.2/\alpha\alpha$  or  $\alpha WS\alpha/\alpha\alpha$ . Overall, these four genotypes accounted for 92.43% of all  $\alpha$ -thalassemia genotypes. The rates of carrier status among the 13,148 husbands of Guangdong ancestry and 14,274 neonates with one or both parents of Guangdong ancestry were 94.56% and 93.68%, respectively (Table 4).

The results displayed that 635 pregnant women were carriers of  $\beta$ -thalassemia, and  $\beta 41-42/\beta A$  was the most common mutation, accounting for almost 40% of all  $\beta$ -thalassemia genotypes (38.27%). Most of the remaining genotypes were  $\beta 654/\beta A$ ,  $\beta 28/\beta A$  or  $\beta 17/\beta A$ . Overall, these four genotypes accounted for 88.19% of all  $\beta$ -thalassemia genotypes. The rates of carrier status among the husbands and the 14,274 neonates were 86.48% and 87.47%, respectively (Table 5).

### The frequencies of carrying genes for the same type of thalassemia among couples

Thalassemia is one of the commonest autosomal recessive hemoglobin disorders; the couples carry the same type of thalassemia has a high risk to have a moderate to severe thalassemia fetus. The main approach of thalassemia prevention and control is to prevent birth of these moderate to severe thalassemia fetus. Therefore, we derived the “familial carrying rate”, i.e., the rate at which couples carry genes for the same type of thalassemia. In total, 266 of the 14,332 couples included two carriers of the same thalassemia genotype (genotype data were missing for 132 individuals). The total familial carrying rate was 1.87%, and the familial carrying rates of  $\alpha$ - and  $\beta$ -thalassemia were 1.68% and 0.20%, respectively (Table 6).

### The probabilities of moderate-to-severe fetal thalassemia

The standard strategy of laboratory diagnosis used for moderate-to-severe fetal thalassemia was combined by phenotypic screening and genotyping. The screening for  $\alpha$ - and  $\beta$ -thalassemia was carried out when the mean corpuscular volume (MCV) was  $<82\text{fL}$  and/or mean corpuscular Hb (MCH) was  $<27\text{pg}$  which indicate hypochromic microcytic anemia. Meanwhile, the serum iron and ferritin were measured for exclusion of iron deficiency anemia. In combination with the Hb A2 level that Hb A2  $<3.0\%$  indicate  $\alpha$ -thalassemia trait and Hb A2  $>3.5\%$  indicate  $\beta$ -thalassemia trait. Then all such positive samples were further characterized by genotyping. Among the 266 couples carrying mutant genes for the same type of thalassemia, 34 had produced fetuses with moderate-to-severe thalassemia. The total rate moderate-to-severe fetal thalassemia was thus 12.78% (34/266) among the couples with the same type of thalassemia, and the rates of moderate-to-severe fetal  $\alpha$ - and  $\beta$ -thalassemia were 12.61% (30/238) and 14.29% (4/28), respectively.

### Discussion

Previous studies have examined the prevalence and molecular spectrum of  $\alpha$ - and  $\beta$ -globin gene mutations in Guangdong Province, but they were limited in sampling area and sample size; there is not a large-scale, large-sample and province-wide study conducted in Guangdong Province. Therefore, previous studies were of limited representative value and may not reveal the true prevalence of thalassemia in Guangdong Province. Our study had considerable financial support, and it has three key features. The first is the large scale, random sampling of one county in each of the twenty-one regions of Guangdong Province. The second is the family-based sampling; because the main aim of thalassemia intervention is to prevent the birth of infants with moderate-to-severe thalassemia, pregnancy is a critical period, and pregnant women and their husbands are critical subjects of intervention. Therefore, we selected pregnant women, their husbands and their fetuses as the subjects of our study. The third advantage is the large random sample. By scientific design and random sampling, we obtained a large random familial sample, including 14,332 families and 40,808 blood samples (13,386 peripheral venous blood samples from pregnant women, 13,148 peripheral venous blood samples from husbands, 14,274 umbilical blood samples). Therefore, our study could reveal the prevalence and molecular variation of  $\alpha$ - and  $\beta$ -globin gene mutations in Guangdong Province.

We found a high prevalence of  $\alpha$ - and  $\beta$ -globin gene mutations. Overall, the frequencies of  $\alpha$ - and  $\beta$ -globin gene mutations are 18.96%, 16.69%, 16.97% and 17.83% among pregnant women,

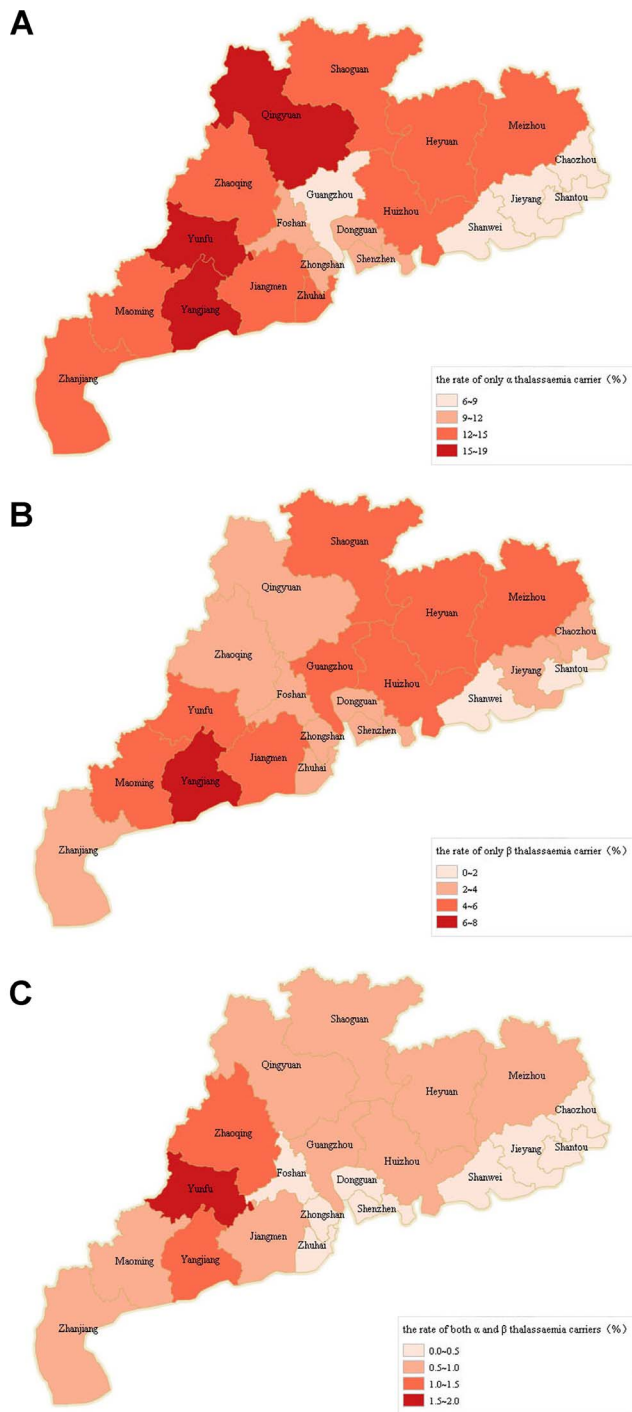

**Figure 1. The rates of carrier status among pregnant women and their husbands in the 21 regions of Guangdong Province, China.** A)  $\alpha$ -thalassemia only; B)  $\beta$ -thalassemia; C)  $\alpha$ - and  $\beta$ -thalassemia. doi:10.1371/journal.pone.0089855.g001

husbands, neonates and “pregnant women and husbands”, respectively. We also found a high prevalence of  $\alpha$ - and  $\beta$ -thalassemia carrier status. The frequencies of carrier status for  $\alpha$ -thalassemia alone were 12.96% of pregnant women, 11.66% of husbands, 11.73% of neonates, and 12.32% of pregnant women and husbands. The frequencies for  $\beta$ -thalassemia alone were 3.98% of pregnant women, 3.76% of husbands, 3.73% of

**Table 4.  $\alpha$ -globin genotypes and  $\alpha$ -thalassemia frequencies among pregnant women, their husbands and neonates in Guangdong Province, China.**

| Genotype                              | Pregnant women |        | Husbands |        | Neonates |        |
|---------------------------------------|----------------|--------|----------|--------|----------|--------|
|                                       | n              | %      | n        | %      | n        | %      |
| —SEA/—SEA                             | —              | —      | —        | —      | 5        | 0.28   |
| —SEA/— $\alpha$ 3.7                   | 23             | 1.25   | 12       | 0.75   | 17       | 0.97   |
| —SEA/— $\alpha$ 4.2                   | 10             | 0.54   | 4        | 0.25   | 6        | 0.34   |
| —SEA/ $\alpha$ CS $\alpha$            | 3              | 0.16   | 2        | 0.12   | 1        | 0.06   |
| —SEA/ $\alpha$ QS $\alpha$            | 1              | 0.05   | 1        | 0.06   | 1        | 0.06   |
| —SEA/ $\alpha$ WS $\alpha$            | 5              | 0.27   | 0        | 0.00   | 1        | 0.06   |
| —SEA/ $\alpha\alpha$                  | 950            | 51.71  | 806      | 50.34  | 895      | 50.97  |
| — $\alpha$ 3.7/— $\alpha$ 3.7         | 6              | 0.33   | 2        | 0.12   | 3        | 0.17   |
| — $\alpha$ 3.7/— $\alpha$ 4.2         | 7              | 0.38   | 0        | 0.00   | 7        | 0.40   |
| — $\alpha$ 3.7/ $\alpha$ CS $\alpha$  | 2              | 0.11   | 2        | 0.12   | 1        | 0.06   |
| — $\alpha$ 3.7/ $\alpha$ QS $\alpha$  | 2              | 0.11   | 1        | 0.06   | 0        | 0.00   |
| — $\alpha$ 3.7/ $\alpha$ WS $\alpha$  | 3              | 0.16   | 2        | 0.12   | 2        | 0.11   |
| — $\alpha$ 3.7/ $\alpha\alpha$        | 452            | 24.61  | 454      | 28.36  | 454      | 25.85  |
| — $\alpha$ 4.2/ $\alpha$ CS $\alpha$  | 0              | 0.00   | 1        | 0.06   | 1        | 0.06   |
| — $\alpha$ 4.2/ $\alpha$ QS $\alpha$  | 1              | 0.05   | 0        | 0.00   | 2        | 0.11   |
| — $\alpha$ 4.2/ $\alpha$ WS $\alpha$  | 2              | 0.11   | 1        | 0.06   | 0        | 0.00   |
| — $\alpha$ 4.2/ $\alpha\alpha$        | 172            | 9.36   | 139      | 8.68   | 161      | 9.17   |
| $\alpha$ CS $\alpha$ / $\alpha\alpha$ | 48             | 2.61   | 39       | 2.44   | 42       | 2.39   |
| $\alpha$ QS $\alpha$ / $\alpha\alpha$ | 26             | 1.42   | 20       | 1.25   | 22       | 1.25   |
| $\alpha$ WS $\alpha$ / $\alpha\alpha$ | 124            | 6.75   | 115      | 7.18   | 135      | 7.69   |
| Total                                 | 1837           | 100.00 | 1601     | 100.00 | 1756     | 100.00 |

doi:10.1371/journal.pone.0089855.t004

neonates, and 3.87% of pregnant women and husbands. Finally, the frequencies for  $\alpha$ - and  $\beta$ -thalassemia together were 0.76% of pregnant women, 0.52% of husbands, 0.57% of neonates, and 0.64% of pregnant women and husbands. Overall, 17.70% of pregnant women, 15.94% of husbands, 16.03% of neonates, and 16.83% of pregnant women and husbands in Guangdong Province were heterozygous carriers of  $\alpha$ - and/or  $\beta$ -thalassemia. Comparing with other countries, the frequency of  $\alpha$ -thalassemia reported in our study are lower than that reported in the north of Thailand and Laos (30%–40%) and higher than that reported in Malaysia (4.5%) and Filipine (5%) [13], and the frequency of  $\beta$ -thalassemia reported in our study are lower than that reported in Cyprus (14%) and Sardinia (10.3%) [14]. And comparing with previous studies in China, these rates are higher than those reported in previous studies in Guangdong Province and other provinces in southern China [9,10,15,16,17,18,19] but are lower than those reported in several studies in Guangxi, Yunnan and Guizhou Provinces [11,20,21,22]. The potential reasons for these differences may include differences in the study population, sampling area and method of gene detection.

The prevalences of  $\alpha$ - and  $\beta$ -thalassemia carrier status varied among the twenty-one regions of Guangdong Province. The regions with the highest prevalence were the mountainous region (including Yunfu, Qingyuan, Meizhou, Heyuan and Shaoguan) and the western region (including Yangjiang, Maoming and Zhanjiang), followed by the Pearl River Delta (including Guangzhou, Shenzhen, Foshan, Zhongshan, Dongguan, Zuhai, Jiangmen, Zhaoqing and Huizhou). The lowest prevalence was

**Table 5.**  $\beta$ -globin genotypes and  $\beta$ -thalassemia frequencies among pregnant women, their husbands and neonates in Guangdong Province, China.

| Genotype                   | Pregnant women |        | Husbands |        | Neonates |        |
|----------------------------|----------------|--------|----------|--------|----------|--------|
|                            | n              | %      | n        | %      | n        | %      |
| $\beta$ -28/ $\beta$ -28   | 0              | 0.00   | 0        | 0.00   | 1        | 0.16   |
| $\beta$ -28/ $\beta$ 17    | 1              | 0.16   | 0        | 0.00   | 0        | 0.00   |
| $\beta$ -28/ $\beta$ A     | 94             | 14.80  | 74       | 13.17  | 82       | 13.36  |
| $\beta$ -28/ $\beta$ E     | 0              | 0.00   | 1        | 0.18   | 0        | 0.00   |
| $\beta$ -29/ $\beta$ A     | 10             | 1.57   | 9        | 1.60   | 9        | 1.47   |
| $\beta$ 14-15/ $\beta$ A   | 6              | 0.94   | 4        | 0.71   | 2        | 0.33   |
| $\beta$ 17/ $\beta$ 41-42  | 0              | 0.00   | 0        | 0.00   | 1        | 0.16   |
| $\beta$ 17/ $\beta$ A      | 52             | 8.19   | 45       | 8.01   | 45       | 7.33   |
| $\beta$ 27-28/ $\beta$ A   | 9              | 1.42   | 10       | 1.78   | 11       | 1.79   |
| $\beta$ 41-42/ $\beta$ -28 | 0              | 0.00   | 0        | 0.00   | 2        | 0.33   |
| $\beta$ 41-42/ $\beta$ A   | 243            | 38.27  | 226      | 40.21  | 254      | 41.37  |
| $\beta$ 41-42/ $\beta$ Cap | 0              | 0.00   | 1        | 0.18   | 1        | 0.16   |
| $\beta$ 43/ $\beta$ A      | 3              | 0.47   | 2        | 0.36   | 3        | 0.49   |
| $\beta$ 654/ $\beta$ A     | 171            | 26.93  | 141      | 25.09  | 156      | 25.41  |
| $\beta$ 71-72/ $\beta$ A   | 15             | 2.36   | 14       | 2.49   | 12       | 1.95   |
| $\beta$ Cap/ $\beta$ A     | 10             | 1.57   | 14       | 2.49   | 12       | 1.95   |
| $\beta$ E/ $\beta$ 41-42   | 0              | 0.00   | 1        | 0.18   | 0        | 0.00   |
| $\beta$ E/ $\beta$ A       | 15             | 2.36   | 14       | 2.49   | 15       | 2.44   |
| $\beta$ Int/ $\beta$ A     | 0              | 0.00   | 1        | 0.18   | 0        | 0.00   |
| $\beta$ IVS-1/ $\beta$ A   | 4              | 0.63   | 4        | 0.71   | 7        | 1.14   |
| $\beta$ IVS-5/ $\beta$ A   | 2              | 0.31   | 1        | 0.18   | 1        | 0.16   |
| Total                      | 635            | 100.00 | 562      | 100.00 | 614      | 100.00 |

doi:10.1371/journal.pone.0089855.t005

found in Chaoshan (including Jieyang, Chaozhou, Shanwei and Shantou). The three regions with the highest prevalence of  $\alpha$ -thalassemia carrier status were Yangjiang, Yunfu and Qingyuan; the three regions with the lowest prevalence were Shantou, Chaozhou and Shanwei. The three regions with the highest prevalence of  $\beta$ -thalassemia carrier status were Yunfu, Yangjiang and Meizhou; the three regions with the lowest prevalence were Shantou, Shanwei and Jieyang. In our study, the prevalence of  $\beta$ -thalassemia carrier status in Zhongshan City (2.70%) was slightly lower than that reported by Zhang CM in 2010 (3.07%) [23], and the results obtained for other cities were also higher than those reported in previous studies [12,24,25,26,27,28,29].

Among  $\alpha$ -globin genotypes, the Southeast-Asian deletion ( $-\text{SEA}/\alpha\alpha$ ) accounts for the greatest proportion in three populations

(pregnant women: 51.71%, husbands: 50.34%, neonates: 50.97%), followed by  $-\alpha 3.7/\alpha\alpha$  (pregnant women: 24.61%, husbands: 28.36%, neonates: 25.85%) and  $-\alpha 4.2/\alpha\alpha$  (pregnant women: 9.36%, husbands: 8.68%, neonates: 9.17%). The study indicates that the Southeast-Asian deletion occurs most frequently; the above three genotypes account for nearly 90% of all  $\alpha$ -globin genotypes in Guangdong Province. Among the  $\beta$ -globin genotypes,  $\beta 41-42/\beta A$  accounts for the greatest proportion in the three populations (pregnant women: 38.27%, husbands: 40.21%, neonates: 41.37%), followed by  $\beta 654/\beta A$  (pregnant women: 26.93%, husbands: 25.09%, neonates: 25.41%) and  $\beta$ -28/ $\beta A$  (pregnant women: 14.80%, husbands: 13.17%, neonates: 13.36%). The study indicates that  $\beta 41-42/\beta A$  occurs most frequently; the above three genotypes account for nearly 80% of all  $\beta$ -globin genotypes in Guangdong Province. Comparing with other countries, the percentage of  $\beta$ -globin genotypes reported in our study are different from that reported in Vietnam, Thailand, India and Sri Lanka [30,31,32,33]. And comparing with previous studies in China, the results are consistent with those reported by Xu XM in Guangdong Province [9] but differ from those reported by Zheng CG in Guangxi Province [5].

Because this study is family-based, we have coined the term “familial carrying rate”, i.e., the rate at which couples carry genes for the same type of thalassemia. This rate has not been described in previous studies. Our study reveals that total familial carrying rate is 1.87% among couples in which the pregnant woman and/or her husband are of Guangdong ancestry; the familial carrying rates of  $\alpha$ - and  $\beta$ -thalassemia are 1.68% and 0.20%, respectively. Furthermore, our study also revealed that the total rate of moderate-to-severe fetal thalassemia is 12.78% among couples carrying genes for the same type of thalassemia; the rates of moderate-to-severe  $\alpha$ - and  $\beta$ -thalassemia are 12.61% and 14.29%, respectively. We thus derive the probability of moderate-to-severe fetal thalassemia among the couples in which the pregnant woman and/or her husband are of Guangdong ancestry from the product of the above two rates (1.87%\*12.78%; 0.24% in Guangdong Province in our study). According to the current annual birth rate in the population of Guangdong ancestry (approximately 1,300,000 in 2012), the estimated total incidence of moderate-to-severe fetal thalassemia would be almost three thousand cases (1,300,000\*0.24%) every year in Guangdong Province. Furthermore, because some cases of induced labor may have been neglected in our study, the above number is likely an underestimate.

To our surprise, twenty-seven of the thirty-four cases of moderate-to-severe fetal thalassemia in our study resulted in live births, indicating that these twenty-seven families never received effectual thalassemia intervention, including prenatal screening, prenatal diagnosis and induced labor. Because of the high prevalence of thalassemia and low accessibility of thalassemia intervention, thalassemia remains a severe public health problem in Guangdong Province. The emphasis in thalassemia prevention and control should be placed on public health education, training doctors, establishing networks and the wide implementation of

**Table 6.** The frequencies of carrying genes for the same type of thalassemia among couples in Guangdong Province, China.

| Variable                            | The number of couple (N) | Family-based carrying rate (%) |
|-------------------------------------|--------------------------|--------------------------------|
| Both $\alpha$ -carriers             | 238                      | 1.68                           |
| Both $\beta$ -carriers              | 28                       | 0.20                           |
| Both $\alpha$ and $\beta$ -carriers | 0                        | 0                              |
| Total                               | 266                      | 1.87                           |

doi:10.1371/journal.pone.0089855.t006

premarital and prenatal screening to increase the accessibility of thalassemia intervention and reduce (ultimately, to zero) the number of infants born with moderate-to-severe thalassemia. The government of Guangdong Province has committed to investing thirty-five million yuan for thalassemia prevention and control among pregnant women and their husbands every year. We also suggest the need for further research, especially on the factors influencing the accessibility of thalassemia intervention, to provide a scientific basis for government decision-making.

## Supporting Information

**Table S1 The situation of sampling.**  
(XLS)

## References

- Weatherall DJ (2003) Genomics and global health: time for a reappraisal. *Science* 302: 597–599.
- Weatherall DJ (2004) Thalassemia: the long road from bedside to genome. *Nat Rev Genet* 5: 625–631.
- Weatherall DJ (2005) Keynote address: The challenge of thalassemia for the developing countries. *Ann N Y Acad Sci* 1054: 11–17.
- Zeng Y-T, Huang S-Z (1985) Alpha-globin gene organisation and prenatal diagnosis of alpha-thalassaemia in Chinese. *Lancet* 1: 304–307.
- Zheng C-G, Liu M, Du J, Chen K, Yang Y, et al. (2011) Molecular spectrum of alpha- and beta-globin gene mutations detected in the population of Guangxi Zhuang Autonomous Region, People's Republic of China. *Hemoglobin* 35: 28–39.
- Zhang J, Zhu B-S, He J, Zeng X-H, Su J, et al. (2012) The spectrum of alpha- and beta-thalassaemia mutations in Yunnan Province of Southwestern China. *Hemoglobin* 36: 464–473.
- Lau Y-L, Chan L-C, Chan Y-Y, Ha S-Y, Yeung C-Y, et al. (1997) Prevalence and genotypes of alpha- and beta-thalassaemia carriers in Hong Kong – implications for population screening. *N Engl J Med* 336: 1298–1301.
- Lin M, Wang Q, Zheng L, Huang Y, Lin F, et al. (2012) Prevalence and molecular characterization of abnormal hemoglobin in eastern Guangdong of southern China. *Clin Genet* 81: 165–171.
- Xu X-M, Zhou Y-Q, Luo G-X, Liao C, Zhou M, et al. (2004) The prevalence and spectrum of alpha and beta thalassaemia in Guangdong Province: implications for the future health burden and population screening. *J Clin Pathol* 57: 517–522.
- Li C-G, Li C-F, Li Q, Li M (2009) Thalassemia incidence and treatment in China with special reference to Shenzhen City and Guangdong province. *Hemoglobin* 33: 296–303.
- Xiong F, Sun M, Zhang X, Cai R, Zhou Y, et al. (2010) Molecular epidemiological survey of haemoglobinopathies in the Guangxi Zhuang Autonomous Region of southern China. *Clin Genet* 78: 139–148.
- Liao C, Mo Q-H, Li J, Li L-Y, Huang Y-N, et al. (2005) Carrier screening for alpha- and beta-thalassaemia in pregnancy: the results of an 11-year prospective program in Guangzhou Maternal and Neonatal hospital. *Prenat Diagn* 25: 163–171.
- Fucharoen S, Winichagoon P (2011) Haemoglobinopathies in southeast Asia. *Indian J Med Res* 134: 498–506.
- Cousens NE, Gaff CL, Metcalfe SA, Delatycki MB (2010) Carrier screening for beta-thalassaemia: a review of international practice. *Eur J Hum Genet* 18: 1077–1083.
- Cai R, Liu J, Wang L, Liang X, Xiao B, et al. (2004) Study on molecular epidemiology of the alpha-thalassaemias in Liuzhou City, Guangxi Autonomous Region, China. *Hemoglobin* 28: 325–333.
- Cai R, Li L, Liang X, Liu Z, Su L, et al. (2002) [Prevalence survey and molecular characterization of alpha and beta thalassaemia in Liuzhou city of Guangxi]. *Zhonghua Liu Xing Bing Xue Za Zhi* 23: 281–285.
- Yanjie Z, Liming R (2004) Screening of Thalassaemia: 26335 Cases. *CHINESE JOURNAL OF FAMILY PLANNING* 12: 409–410.
- Wang X, Jiang H, Jia J, Zhou J, Liao J, et al. (2011) [Screening and genetic analysis of thalassemia in Sichuan District]. *Sheng Wu Yi Xue Gong Cheng Xue Za Zhi* 28: 135–137.
- Chen J-K, ZY, Li F (2005) Screening report of thalassemia carrier of pregnant woman in Ganzhou. *J Gannan Med Coll* 25.
- Pan H-F, Long G-F, Li Q, Feng Y-N, Lei Z-Y, et al. (2007) Current status of thalassemia in minority populations in Guangxi, China. *Clin Genet* 71: 419–426.
- Zhao Z-M, Yao L-Q, Fan L-M, Zou T-B, Chen Q, et al. (2011) [Epidemiological study on thalassemia among the children of 0-7 years old among the six ethnic groups in Xishuangbanna and Dehong of Yunnan province]. *Zhonghua Liu Xing Bing Xue Za Zhi = Zhonghua liuxingbingxue zazhi* 32: 352–356.
- Yu F, Zhong C, Zhou Q, Yang Y, Li W, et al. (2010) [Genetic analysis of  $\beta$ -thalassaemia mutations in the minority populations of Guizhou province]. *Zhonghua yi xue yi chuan xue za zhi = Zhonghua yixue yichuanxue zazhi = Chinese journal of medical genetics* 27: 700–703.
- Zhang C-M, Wang Y, Gao L-S, Gao J-H, He X-L, et al. (2010) Molecular epidemiology investigation of beta-thalassaemia in Zhongshan City, Guangdong Province, People's Republic of China. *Hemoglobin* 34: 55–60.
- Lin M, Wen Y-F, Wu J-R, Wang Q, Zheng L, et al. (2013) Hemoglobinopathy: molecular epidemiological characteristics and health effects on Hakka people in the Meizhou region, southern China. *PLoS One* 8: e55024.
- Li Z, Li F, Li M, Guo R, Zhang W (2006) The prevalence and spectrum of thalassemia in Shenzhen, Guangdong Province, People's Republic of China. *Hemoglobin* 30: 9–14.
- Yong S-T, LH, Zhou Z-Q, Wu A-J (2006) Research of screen diagnosis of thalassemia in fetus and neonate of the past ten years in the region of Qinyuan. *Modern Prev Med* 33: 12.
- Tan J-R, LW, Ma J-Y, et al. (2003) Molecular epidemiological study of alpha- and beta-thalassaemia in Sihui city. *J First Mil Med Univ* 23: 4.
- Lu B-C, Zhao M-L, Zhuang Z-L (1992) Gene frequency of thalassemia of character and G6PD deficiency of 3766 perinatal pairs in Zhanjiang City of Guangdong Province. *Zhanjiang Yi Xue Yuan Xue Bao* 10: 3.
- Song S-Z, C-S, Zeng M-Z, et al. (2004) Report and analysis of screening thalassemia from the pilot program district of Guangdong province. *Chin J Fam Plann* 105: 3.
- Filon D, Oppenheim A, Rachmilewitz EA, Kot R, Truc D-B (2000) Molecular analysis of beta-thalassaemia in Vietnam. *Hemoglobin* 24: 99–104.
- Fucharoen S, Fucharoen G, Sriroongrueng W, Laosombat V, Jetsrisuparb A, et al. (1989) Molecular basis of beta-thalassaemia in Thailand: analysis of beta-thalassaemia mutations using the polymerase chain reaction. *Hum Genet* 84: 41–46.
- Verma I-C, Saxena R, Kohli S (2011) Past, present & future scenario of thalassaemic care & control in India. *Indian J Med Res* 134: 507–521.
- Premawardhana A, De Silva S, Arambepola M, Olivieri N, Merson L, et al. (2004) Thalassemia in Sri Lanka: a progress report. *Hum Mol Genet* 13 Spec No 2: R203–206.

## Acknowledgments

We thank experts of thalassemia and epidemiology from Sun Yat-sen University and Jinan University for their assistance on investigation design, and ninety-one sampling hospitals for their support on site survey.

## Author Contributions

Conceived and designed the experiments: XZZ AHY BL QGZ. Performed the experiments: AHY BL QGZ LCX LW YM TTC SG MYL JQL HG DQQ JCW TLY YXW YXZ CL. Analyzed the data: XZZ AHY BL QGZ. Contributed reagents/materials/analysis tools: LZ WH WFH QSC SJX. Wrote the paper: XZZ AHY BL QGZ.
